# Supplementary material for: Hedgehog-inspired immunomagnetic beads for high-efficient capture and release of exosomes
Source: Royal Society of Chemistry journal article supplement (doi:10.1039/d2tb00226d), 2022-01-01
Supplement: d2tb00226d1.pdf [file d2tb00226d1.pdf]

## Supporting Information

### **Hedgehog-inspired immunomagnetic beads for high-efficient capture and release of exosomes**

**Jia Cheng, Nanhang Zhu, Yujia Zhang, Yue Yu, Ke Kang, Qiangying Yi \* and Yao Wu \***

National Engineering Research Center for Biomaterials, Sichuan University, Chengdu 610064, P. R. China

Corresponding Author:

\*E-mail: [qyi@scu.edu.cn](mailto:qyi@scu.edu.cn) (Q.Y.).

\*E-mail: [wuyao@scu.edu.cn](mailto:wuyao@scu.edu.cn) (Y.W.).

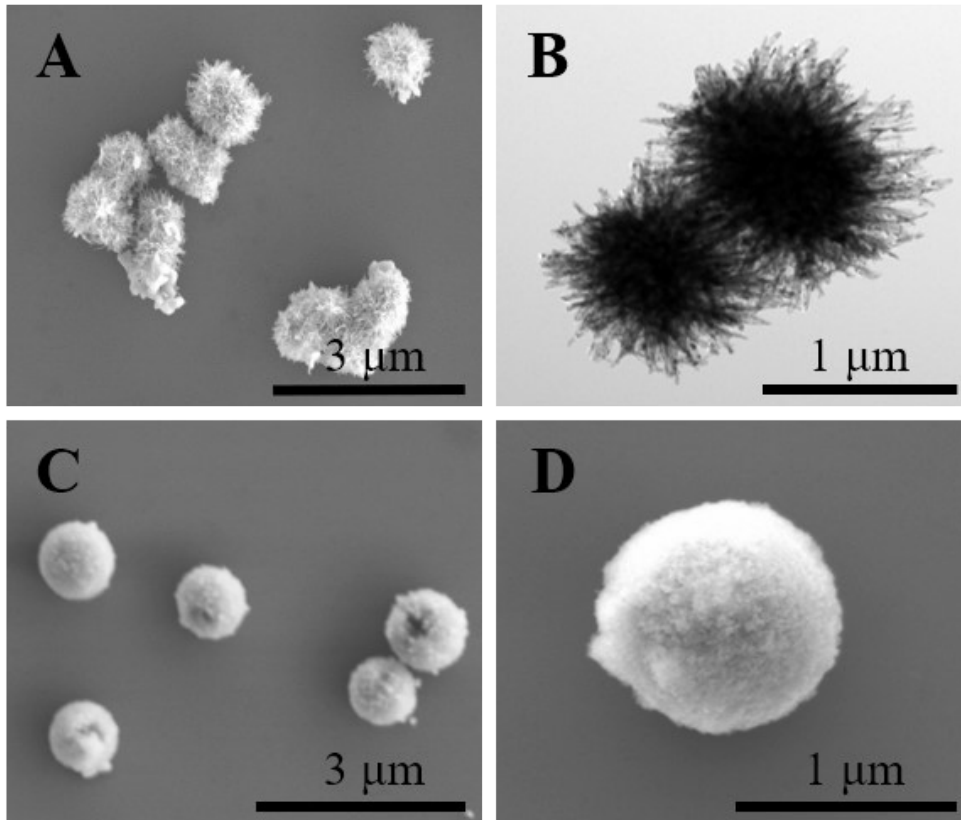

**Fig. S1** (A) SEM and (B)TEM images of  $\text{TiO}_2$  HPs. (C-D) SEM images of  $\text{SiO}_2@Fe_3O_4$  MPs.

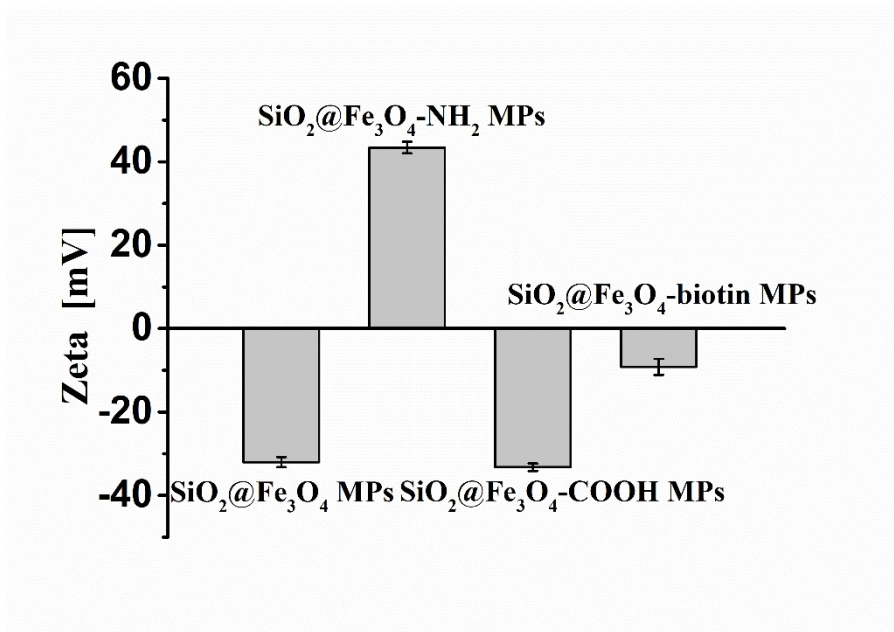

**Fig. S2** Zeta potential measurements of the  $\text{SiO}_2@Fe_3O_4$  MPs,  $\text{SiO}_2@Fe_3O_4-NH_2$  MPs,  $\text{SiO}_2@Fe_3O_4-COOH$  MPs,  $\text{SiO}_2@Fe_3O_4$ -biotin MPs.

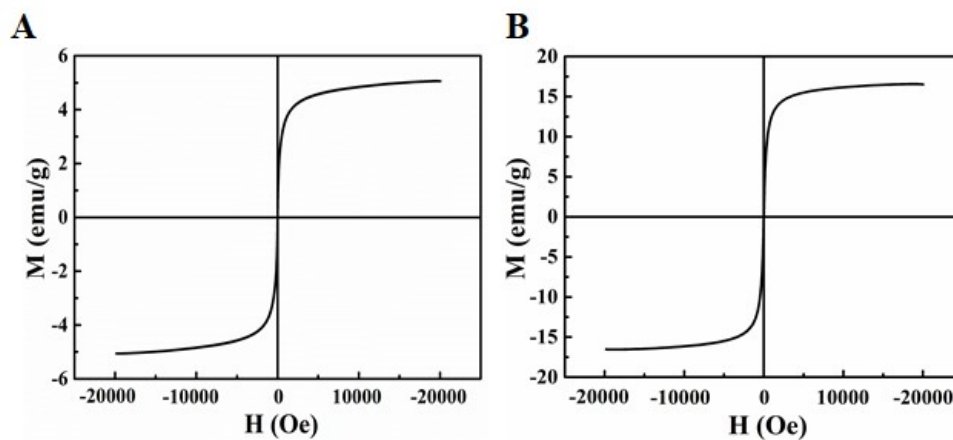

**Fig. S3.** Magnetic hysteresis loops of (A)  $\text{TiO}_2@Fe_3O_4$ -biotin MPs and (B)  $\text{SiO}_2@Fe_3O_4$ -biotin MPs.

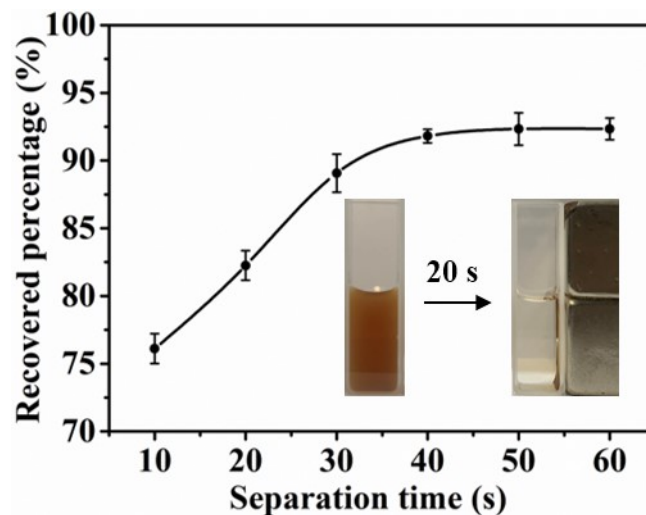

**Fig. S4** The recovery percentage of  $\text{SiO}_2@Fe_3O_4$ -biotin MPs at different separation times; the inset graph shows the magnetic separation process.

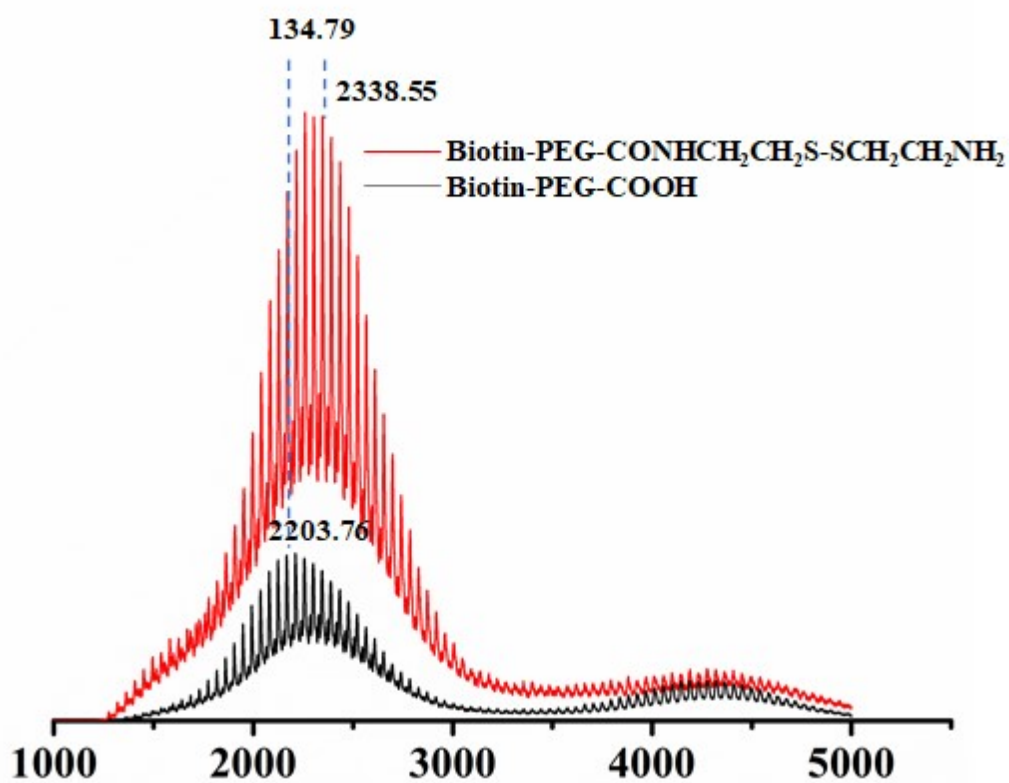

**Fig. S5** MALDI-TOF-MS spectra of biotin-PEG-COOH and biotin-PEG-CONHCH<sub>2</sub>CH<sub>2</sub>S-SCH<sub>2</sub>CH<sub>2</sub>NH<sub>2</sub>.

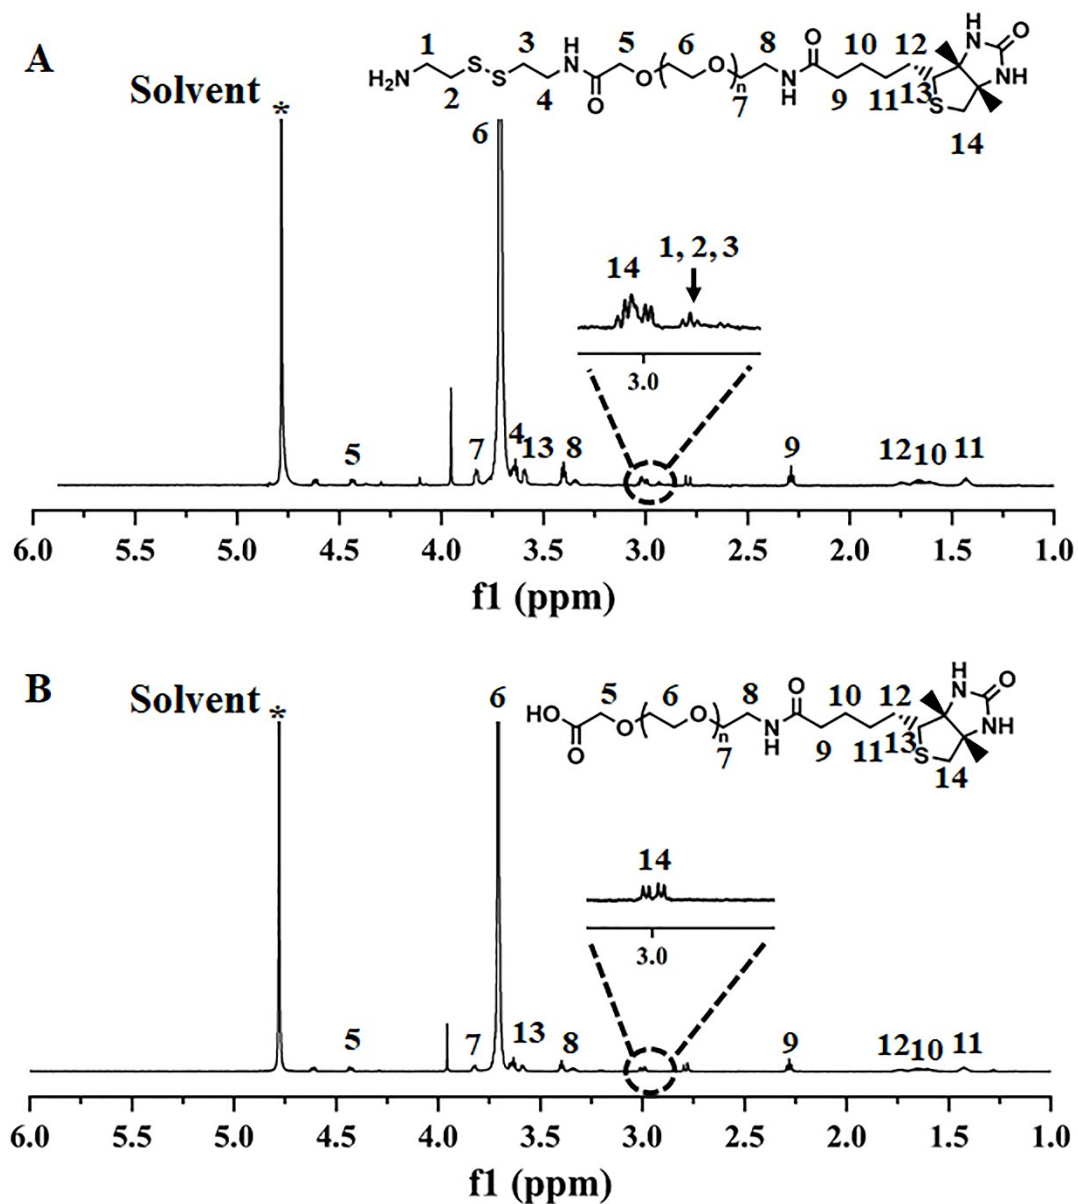

**Fig. S6**  $^1\text{H}$  NMR spectra (600 MHz,  $\text{D}_2\text{O}$ , room temperature) of (A) biotin-PEG- $\text{CONHCH}_2\text{CH}_2\text{S-SCH}_2\text{CH}_2\text{NH}_2$  and (B) biotin-PEG-COOH.

$^1\text{H}$  NMR spectra verified that the biotin-PEG- $\text{CONHCH}_2\text{CH}_2\text{S-SCH}_2\text{CH}_2\text{NH}_2$  was successfully obtained through condensation reaction between biotin-PEG-COOH and biotin- $\text{NH}_2\text{CH}_2\text{CH}_2\text{S-SCH}_2\text{CH}_2\text{NH}_2$ . The chemical shifts at  $\delta$  2.80-2.95 (ppm) confirmed the successful conjugation of the  $\text{NH}_2\text{CH}_2\text{CH}_2\text{S-SCH}_2\text{CH}_2\text{NH}_2$  onto the terminal of biotin-PEG-COOH.

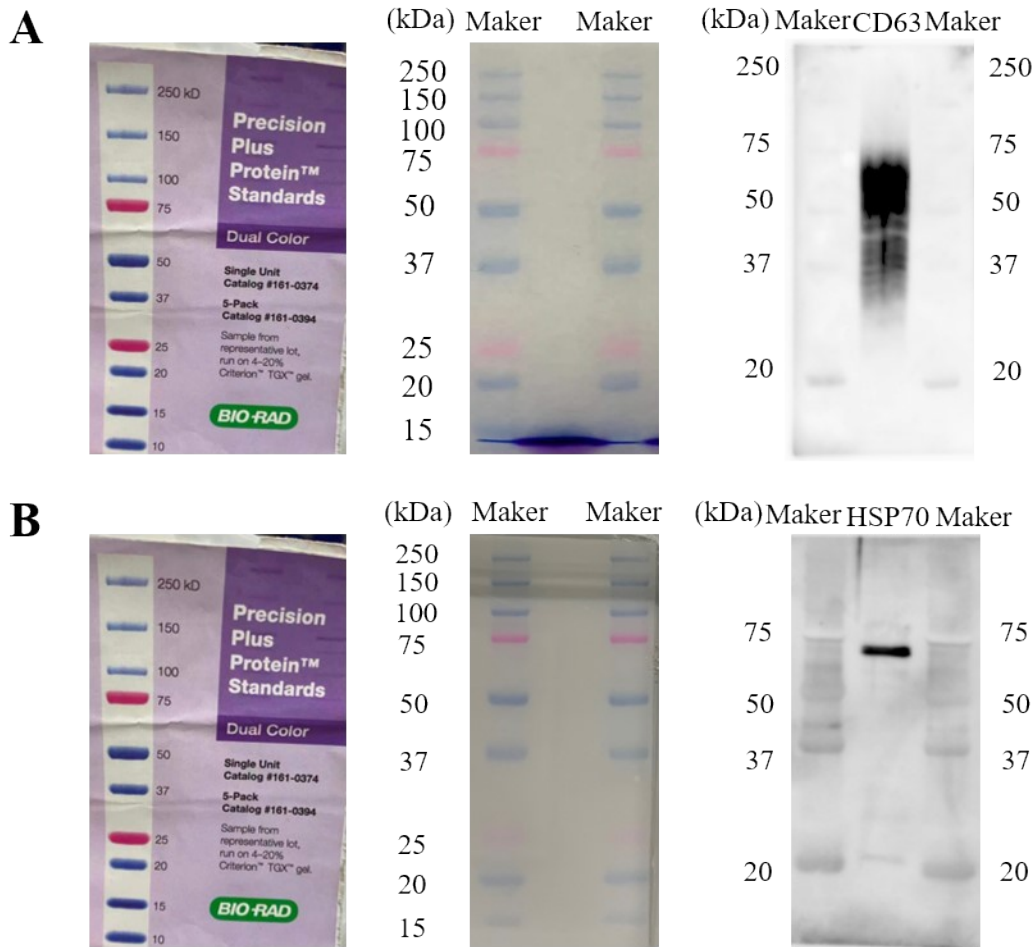

**Fig. S7** Raw data of the western blot results, (A) CD63 and (B) HSP70.

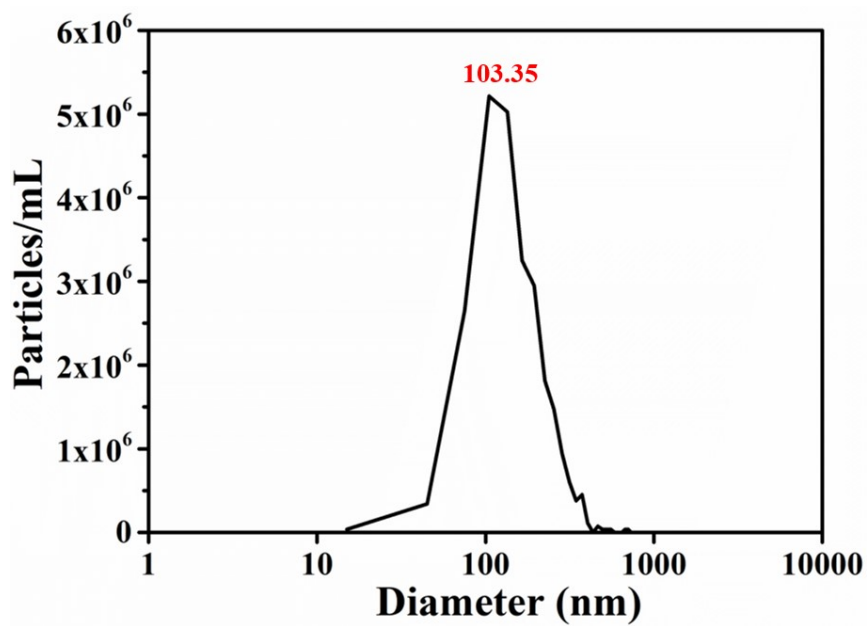

**Fig. S8** The size distribution of the released MCF-7 exosomes by NTA.
